# Supplementary material
Source: PubMed Central journal article supplement (PMC10006844)
Supplement: mmc1.pdf [file mmc1.pdf]

**iScience, Volume 26**

**Supplemental information**

**SARS-CoV-2 leverages airway epithelial protective  
mechanism for viral infection**

**Allison Marie Greaney, Micha Sam Brickman Raredon, Maria P. Kochugaeva, Laura E. Niklason, and Andre Levchenko**

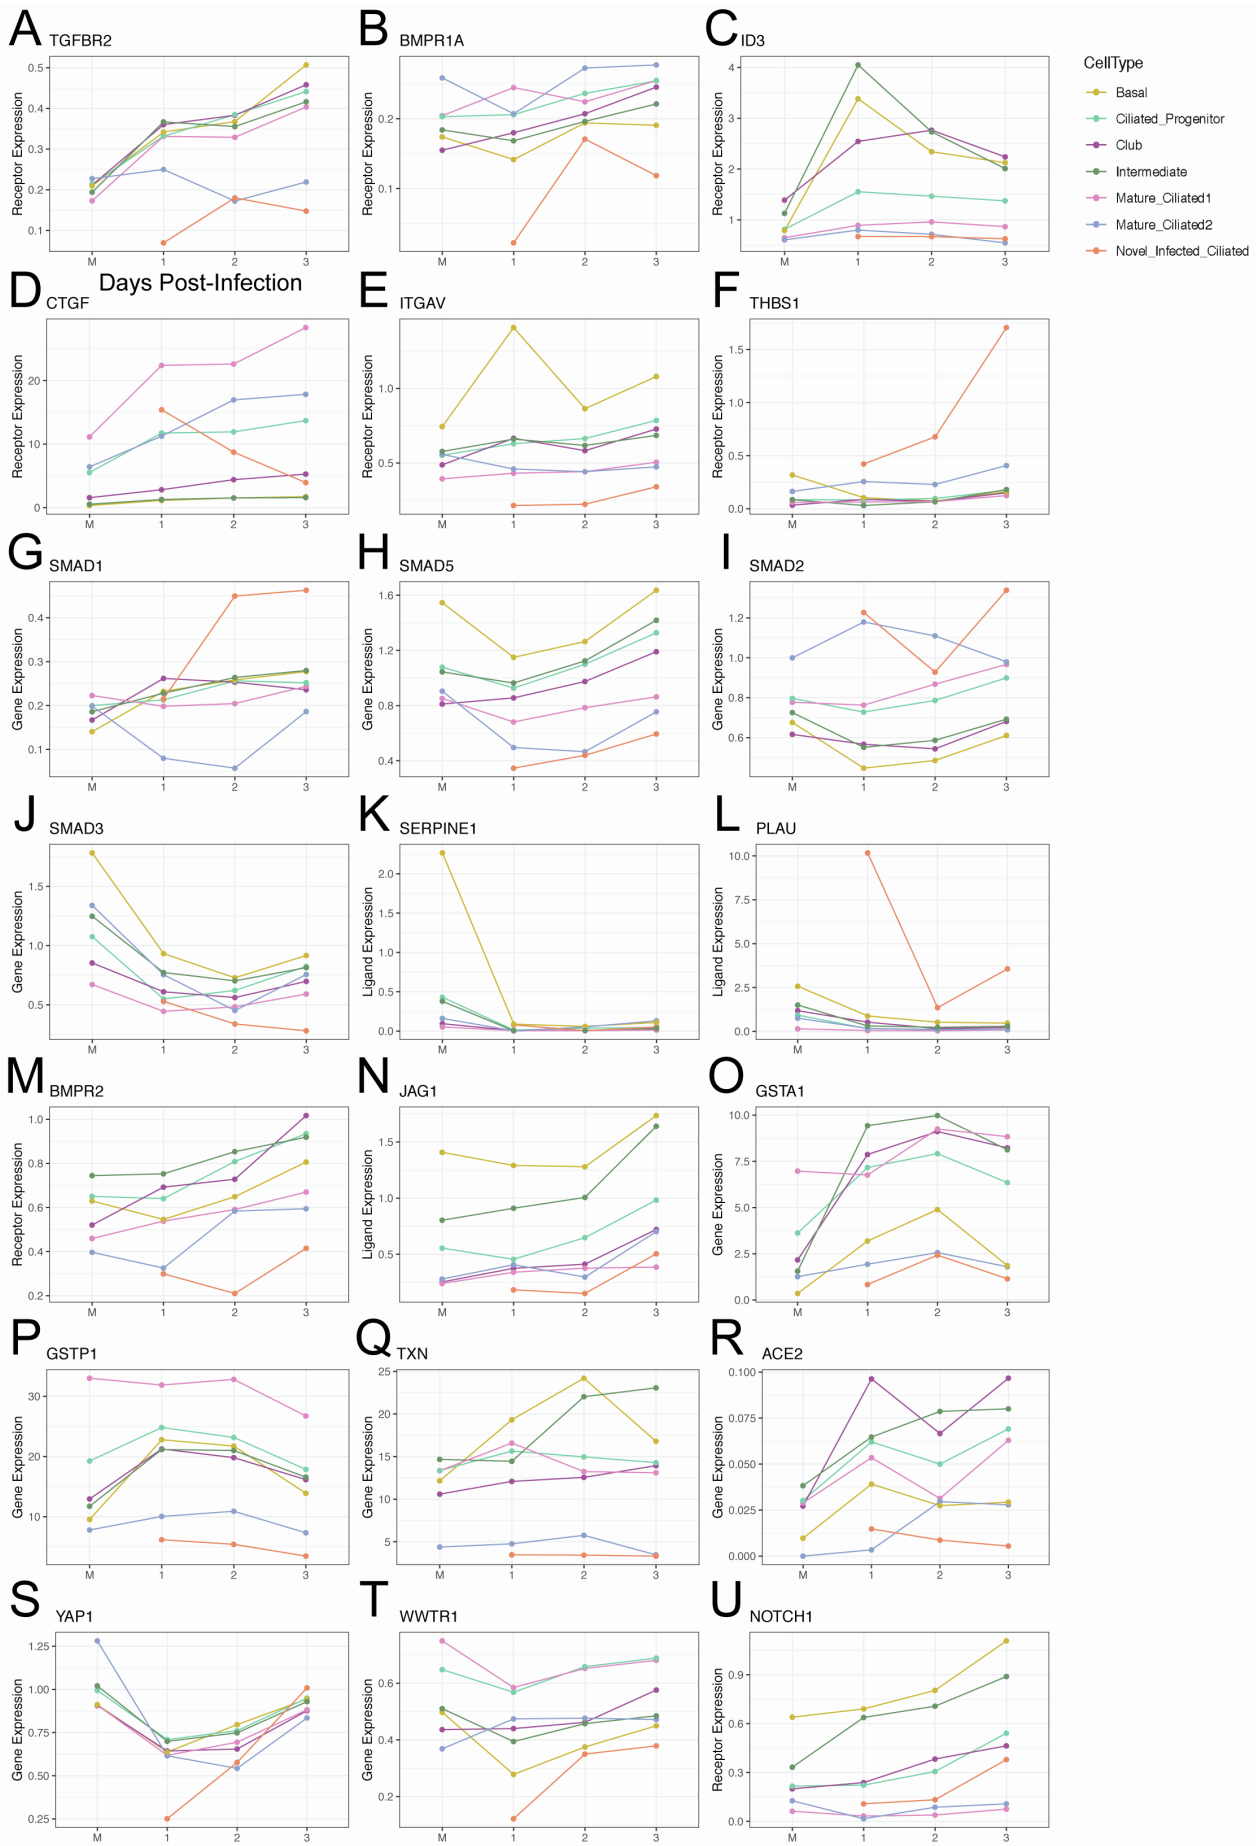

Figure S1. Extended analysis of ligand-receptor signaling perturbations in infected samples, related to Figure 4. A-U) Longitudinal line plots of key signaling genes of interest, split and colored by cell type, over time. All gene expression was calculated using a standard log-normalization technique (see Methods).
